# Supplementary material for: A long-cycling anode based on a coral-like Sn nanostructure with a binary binder
Source: Royal Society of Chemistry journal article supplement (doi:10.1039/c9cc04477a), 2019-01-01
Supplement: c9cc04477a1.pdf [file c9cc04477a1.pdf]

## Supplementary Information

### Long-cyclic anode based on coral-like Sn nanostructure with binary binder

Yuhang Liu,<sup>a</sup> Jinmeng Sun,<sup>a</sup> Hongfang Du,<sup>a</sup> Song He,<sup>a</sup> Linghai Xie,<sup>a,c</sup> Wei Ai<sup>\*a</sup> and Wei Huang<sup>\*a,b,c</sup>

<sup>a</sup>*Institute of Flexible Electronics (IFE), Northwestern Polytechnical University (NPU), 127 West Youyi Road, Xi'an 710072, China*

<sup>b</sup>*Key Laboratory of Flexible Electronics (KLOFE) & Institute of Advanced Materials (IAM), Jiangsu National Synergetic Innovation Center for Advanced Materials (SICAM), Nanjing Tech University (NanjingTech), 30 South Puzhu Road, Nanjing 211816, China*

<sup>c</sup>*Key Laboratory for Organic Electronics & Information Displays (KLOEID) and Institute of Advanced Materials (IAM), SICAM, Nanjing University of Posts & Telecommunications, Nanjing 210023, Jiangsu, China*

Correspondence and requests for materials should be addressed to

W. Ai ([iamwai@nwpu.edu.cn](mailto:iamwai@nwpu.edu.cn)) or to W. Huang ([iamwhuang@nwpu.edu.cn](mailto:iamwhuang@nwpu.edu.cn)).

## Experimental procedures

### 1. Synthesis of Coral-like Sn

The coral-like Sn was prepared through a simple displacement reaction:  $4\text{Li} + \text{SnCl}_4 = \text{Sn} + 4\text{LiCl}$ . Briefly, 25 pieces of lithium foils (commercially available lithium foils used for LIBs, 20 mg each) were cut into small pieces and transferred into a two-necked flask filled with 50 mL anhydrous m-xylene solution (Sigma-Aldrich) in a glovebox. Next, 5 mL anhydrous  $\text{SnCl}_4$  (98%, Sigma-Aldrich) was injected slowly using a syringe under vigorous stirring. After 25 h stirring under argon atmosphere, the mixture was filtered to remove the solid residues, and the gray-black suspension was redispersed in 300 mL ethanol. Finally, the product was collected by centrifugation, and then washed with ethanol/water for several times. The obtained grayish powder was dried in a vacuum oven at 80 °C for 12 h.

### 2. Materials Characterization

Powder XRD was recorded by a Bruker D8 Advance diffractometer with  $\text{Cu } K_\alpha$  radiation ( $\lambda=0.154056$  nm). SEM images were collected using a scanning electron microscopy (JEOL JSM-6700F) at an accelerating voltage of 10 kV. TEM analysis was performed by a transmission electron microscopy (FEI Tecnai G<sup>2</sup> F30) at an accelerating voltage of 300 kV. The elastic modulus was measured using a nanoindentation (Hysitron TI980) at a load of 10 mN.

### 3. Electrochemical Measurements

For electrochemical tests, the working electrodes were fabricated by mixing active material (coral-like Sn), conductive material (acetylene black) and binder (NaCMC, NaCMC/GO, or GO) into deionized water (See Table S1 for details). The slurry was then uniformly coated on a copper foil and dried in a vacuum oven at 100 °C for 12 h. The as-prepared films were punched into disk electrodes ( $d = 12$  mm), and the active material loaded on each electrode was determined to be  $\sim 1$  mg  $\text{cm}^{-2}$ . Coin-type cells were assembled using lithium foil as the counter electrode, Celgard@2400 polypropylene member as the separator, respectively. 1 M  $\text{LiPF}_6$  in a complex solvent (ethylene carbonate, ethyl methyl carbonate and dimethyl carbonate with volume ratio of 1:1:1) was applied as the electrolyte. All the coin cells were assembled in a

glovebox with both H<sub>2</sub>O and O<sub>2</sub> content less than 0.1 ppm. Electrochemical tests were measured with CHI 760D electrochemical workstation and NEWARE battery analyzer after ageing for 12 h.

**Table S1.** The mass ratio of electrode components used in slurry coating technique.

| Sample         | Sn powder (wt%) | Acetylene black (wt%) | NaCMC (wt%) | GO (wt%) |
|----------------|-----------------|-----------------------|-------------|----------|
| 10% NaCMC      | 70              | 20                    | 10          | 0        |
| 5% NaCMC/5% GO | 70              | 20                    | 5           | 5        |
| 10% GO         | 70              | 20                    | 0           | 10       |

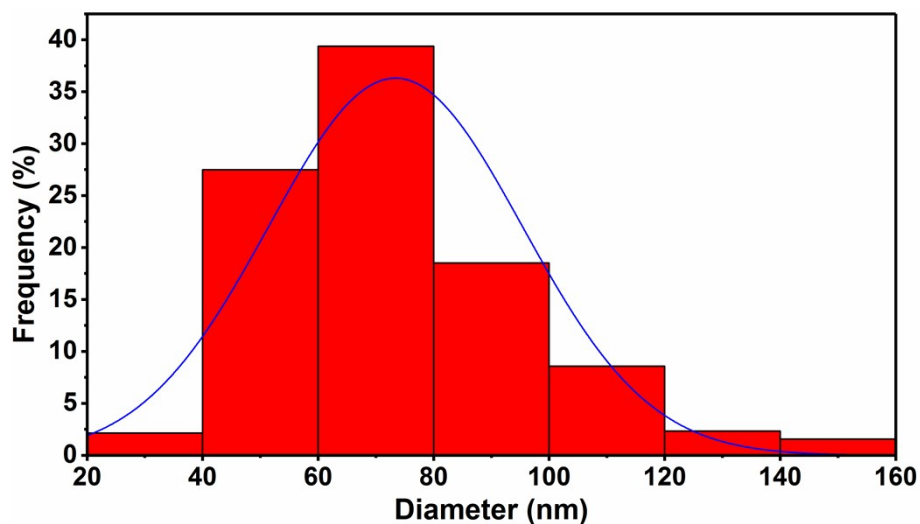

**Fig. S1** Size distribution histogram of the as-obtained coral-like metallic Sn.

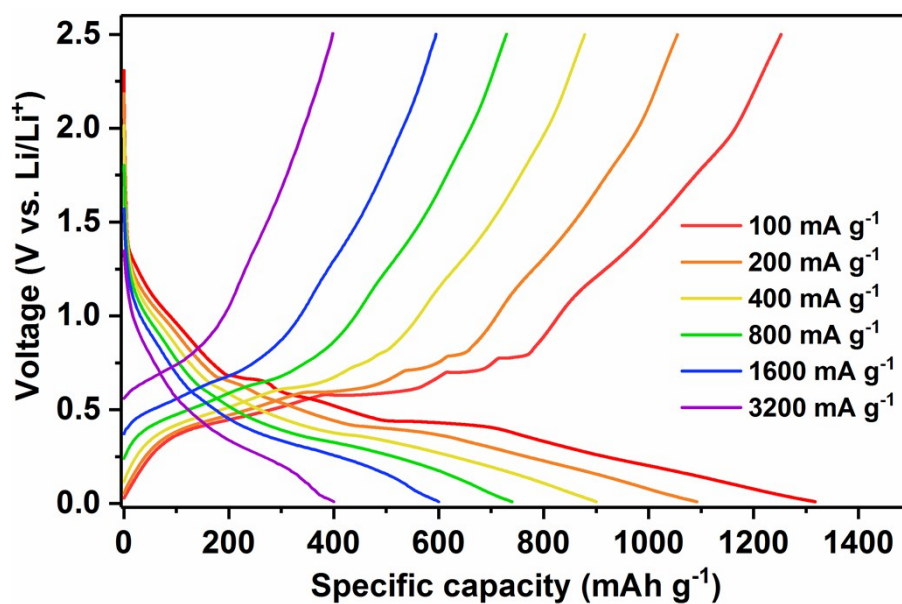

**Fig. S2** The charge-discharge profiles of the 5 wt% NaCMC/5 wt% GO binder electrode at various current densities.

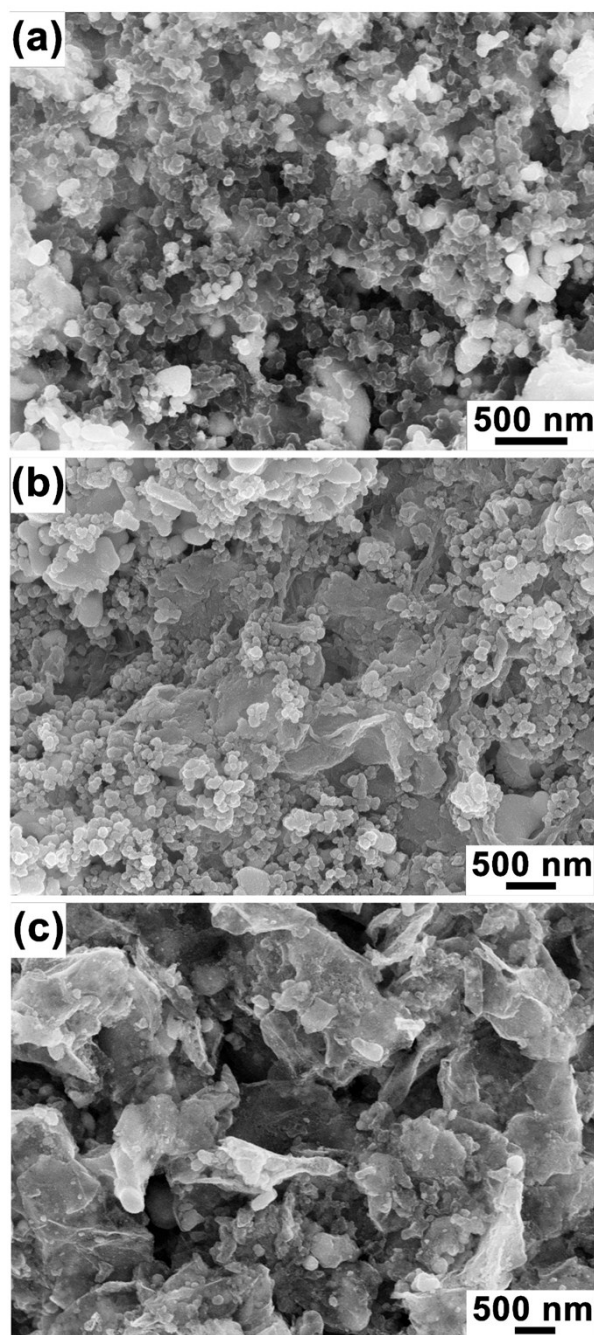

**Fig. S3** SEM images of fresh electrodes prepared with (a) 10 wt% NaCMC, (b) 5 wt% NaCMC/5 wt% GO, and (c) 10 wt% GO binders, respectively.

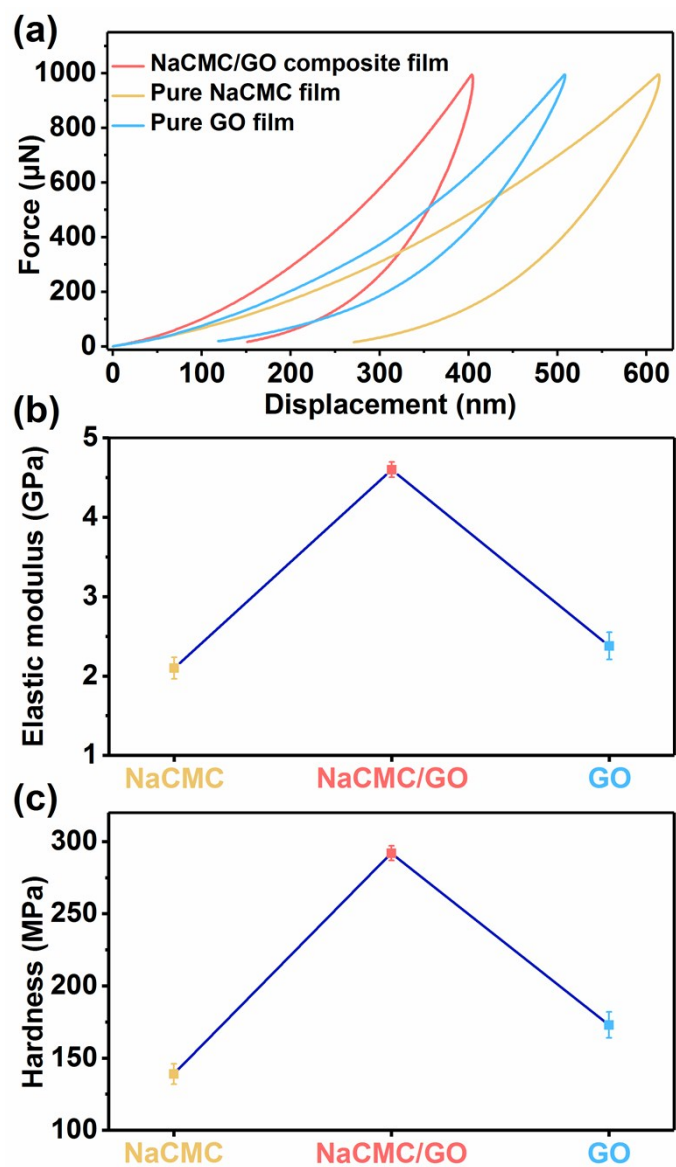

**Fig. S4** (a) The force-displacement curve, (b) elastic modulus and (c) hardness of the NaCMC, GO and NaCMC/GO composite films at a load of 10 mN.

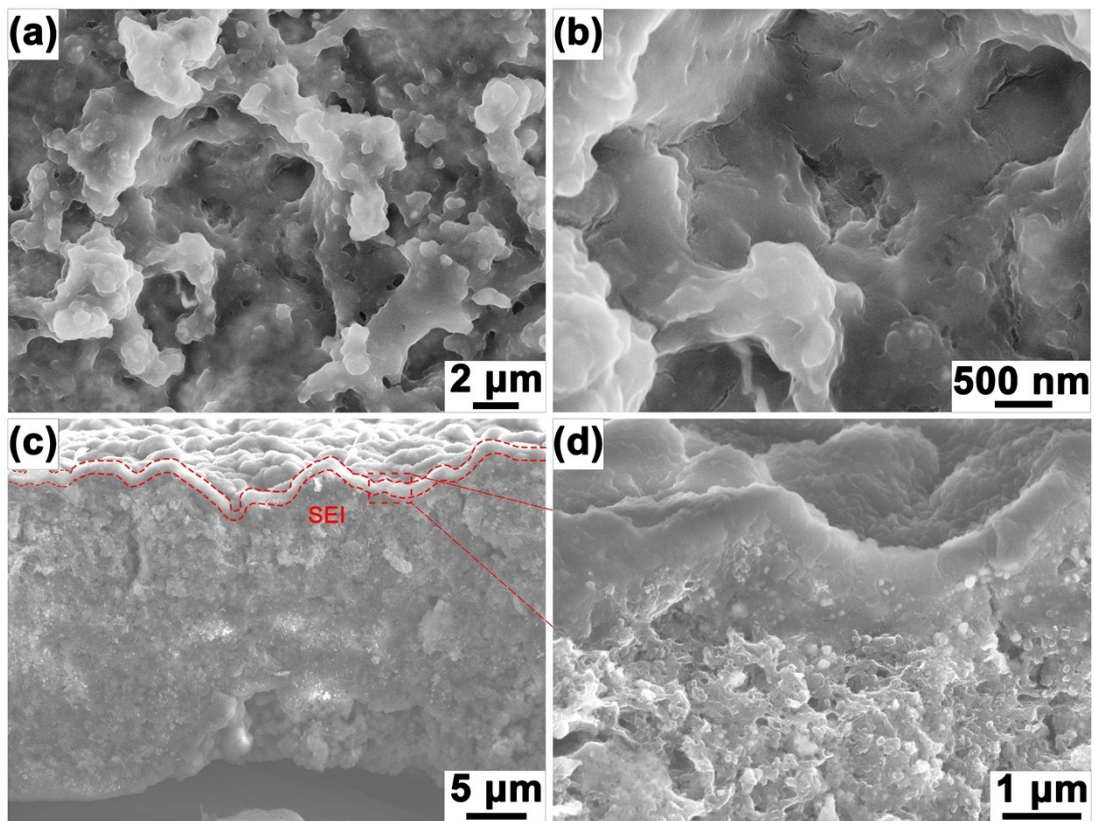

**Fig. S5** (a, b) Surface and (c, d) cross-section SEM images of the 5 wt% NaCMC/5 wt% GO binder electrode after 50 cycles at a current density of  $500 \text{ mA g}^{-1}$ .
